# Supplementary figures and images for: Development and Validation of a Sexual-Outlook Questionnaire (SOQ) for Adult Populations in the Republic of Korea
Source: MDPI journal article supplement (doi:10.3390/ijerph17228681), 2020-11-23

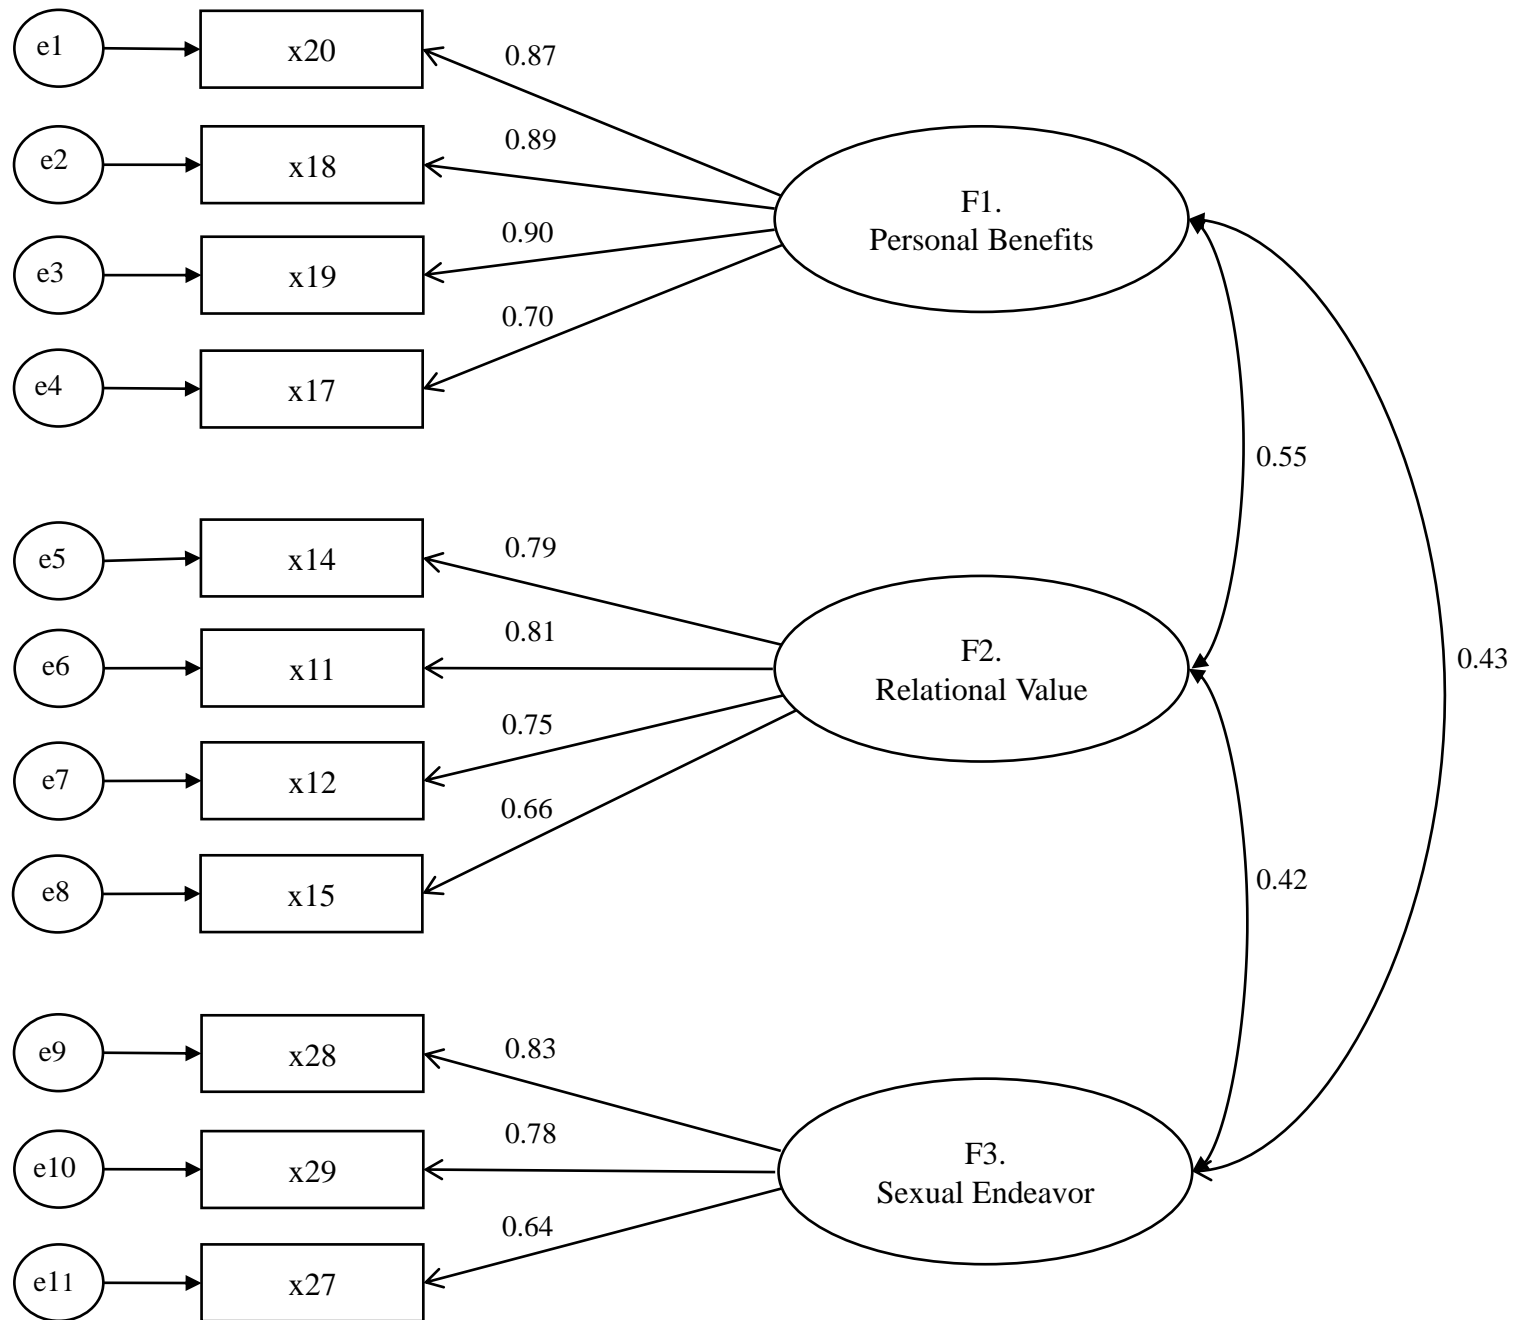

Supplement: s1 [file s1]
